# Supplementary material
Source: Springer Nature journal article supplement (https://www.springermedizin.de/resource/supplementary/12882_2012_275_MOESM6_ESM.pdf/9453418)

$r_0$

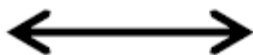

$r$

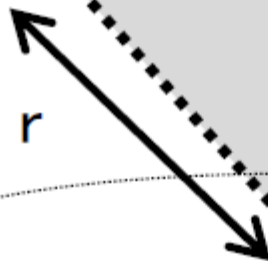

$h$

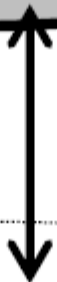

$2h$

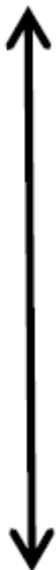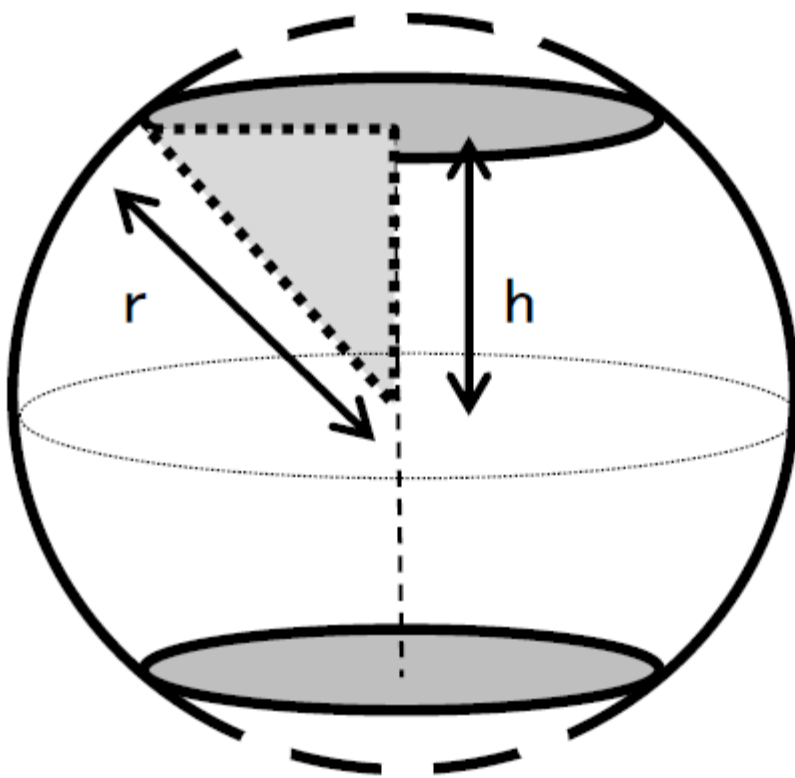

Supplement: MOESM6 [file 9453418]
